# Supplementary material for: Network Pharmacology‐Based Prediction of Active Ingredients and Potential Targets of ShengDiHuang Decoction for Treatment of Dysfunctional Uterine Bleeding
Source: Hindawi journal article supplement (doi:10.1155/2020/7370304), 2020-01-01
Supplement: f1 [file 7370304.f1.pdf]

Supplementary Table 1 The information of active compounds

| ID  | Chemical name                | Formula              | Structure                                                                             | Herb name |
|-----|------------------------------|----------------------|---------------------------------------------------------------------------------------|-----------|
| R-1 | (-)-Catechin                 | $C_{15}H_{14}O_6$    | 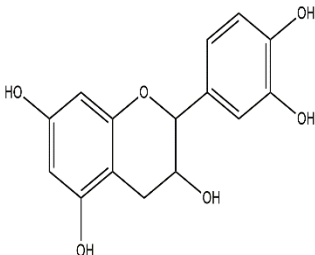   | Rheum     |
| R-2 | 3,4,5-Trihydroxybenzoic acid | $C_7H_6O_5$          |    | Rheum     |
| R-3 | Aloe emodin                  | $C_{15}H_{10}O_5$    |   | Rheum     |
| R-4 | (-)-Epicatechin-pentaacetate | $C_{25}H_{24}O_{11}$ |  | Rheum     |
| R-5 | (+)-Catechin-pentaacetate    | $C_{25}H_{24}O_{11}$ |  | Rheum     |
| R-6 | (E)-4-Phenyl-3-Buten-2-One   | $C_{10}H_{10}O$      |  | Rheum     |

|      |                                                         |                      |  |       |
|------|---------------------------------------------------------|----------------------|--|-------|
| R-7  | 1,8-dihydroxy-3-methoxy-2,6-dimethyl-9,10-anthraquinone | $C_{17}H_{14}O_5$    |  | Rheum |
| R-8  | Anthraglycoside B                                       | $C_{21}H_{20}O_{10}$ |  | Rheum |
| R-9  | Chrysophanol glucoside                                  | $C_{21}H_{20}O_9$    |  | Rheum |
| R-10 | citric acid                                             | $C_6H_8O_7$          |  | Rheum |
| R-11 | Emodin                                                  | $C_{15}H_{10}O_5$    |  | Rheum |
| R-12 | Emodin-6-glucoside                                      | $C_{21}H_{20}O_{10}$ |  | Rheum |

|      |                                        |                      |                                                                                       |       |
|------|----------------------------------------|----------------------|---------------------------------------------------------------------------------------|-------|
| R-13 | EUPATIN                                | $C_{18}H_{16}O_8$    | 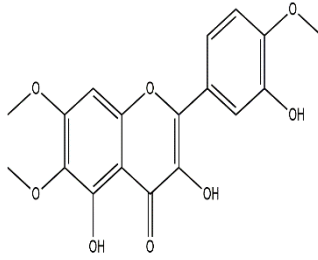   | Rheum |
| R-14 | Physcion                               | $C_{16}H_{12}O_5$    |    | Rheum |
| R-15 | Physcion-9-O-beta-D-glucopyranoside_qt | $C_{28}H_{32}O_{15}$ |    | Rheum |
| R-16 | 5-acetyl-7-hydroxy-2-methyl-chromone   | $C_{12}H_{10}O_4$    |  | Rheum |
| R-17 | cinnamic acid                          | $C_9H_8O_2$          |  | Rheum |
| R-18 | Progesterone                           | $C_{21}H_{30}O_2$    |  | Rheum |

---

R-19                      2-Methyl Cardol                       $C_{22}H_{34}O_2$                       Rheum

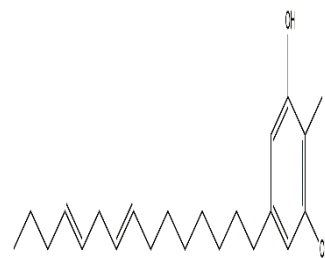

R-20                      Chrysophanol                       $C_{15}H_{10}O_4$                       Rheum

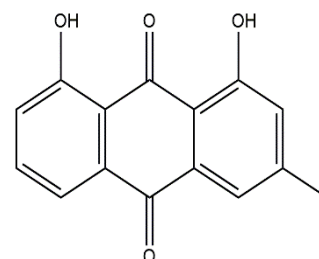

R-21                      Emodin Anthrone                       $C_{15}H_{12}O_4$                       Rheum

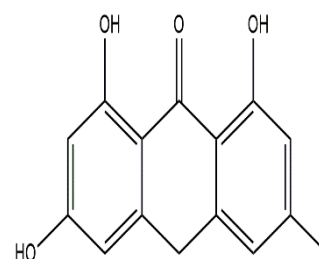

R-22                      Palmidin C                       $C_{30}H_{22}O_7$                       Rheum

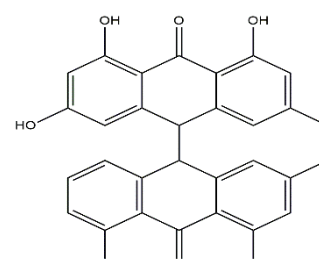

R-23                      Rhein                       $C_{15}H_8O_6$                       Rheum

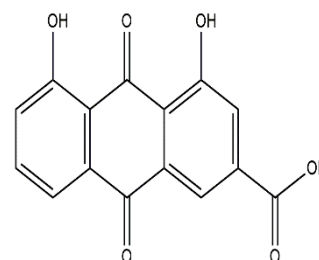

R-24                      Serotonine                       $C_{12}H_{12}N_2O$                       Rheum

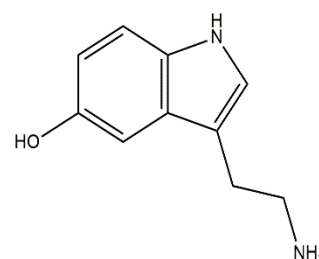

|      |                                                        |                    |                                                                                       |       |
|------|--------------------------------------------------------|--------------------|---------------------------------------------------------------------------------------|-------|
| R-25 | Toralactone                                            | $C_{15}H_{12}O_5$  | 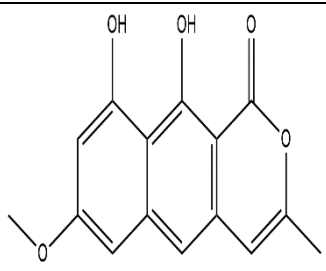   | Rheum |
| R-26 | Serotonin                                              | $C_{10}H_{12}N_2O$ |    | Rheum |
| R-27 | 3-Hydroxy-25-norfriedel-3,1(10)-dien-2-one-30-oic acid | $C_{29}H_{42}O_4$  |    | Rheum |
| R-28 | $\beta$ -sitosterol                                    | $C_{27}H_{48}O$    |  | Rheum |
| R-29 | DLA                                                    | $C_3H_6O_3$        |  | Rheum |
| R-30 | DMR                                                    | $C_4H_6O_5$        |  | Rheum |

|      |               |                   |                                                                                       |       |
|------|---------------|-------------------|---------------------------------------------------------------------------------------|-------|
| R-31 | MAE           | $C_4H_4O_4$       | 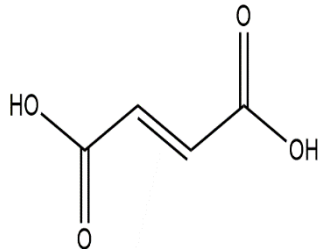   | Rheum |
| R-32 | OXL           | $C_2H_2O_4$       |    | Rheum |
| R-33 | succinic acid | $C_4H_6O_4$       |    | Rheum |
| R-34 | Epicatechin   | $C_{15}H_{14}O_6$ |  | Rheum |
| R-35 | Gallicacid    | $C_7H_6O_5$       |  | Rheum |
| R-36 | Gallocatechin | $C_{15}H_{14}O_7$ |  | Rheum |

|      |                                                   |                   |                                                                                       |       |
|------|---------------------------------------------------|-------------------|---------------------------------------------------------------------------------------|-------|
| R-37 | Rheidin A                                         | $C_{30}H_{20}O_9$ | 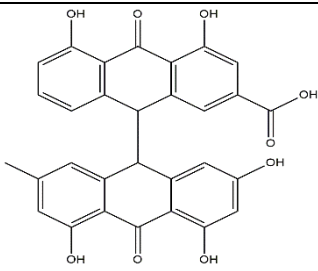   | Rheum |
| R-38 | Rheidin B                                         | $C_{30}H_{20}O_8$ |    | Rheum |
| R-39 | Pontigenin                                        | $C_{15}H_{14}O_4$ |    | Rheum |
| R-40 | 10beta-Hydroxy-6beta-isobutyrylfuranoeremophilane | $C_{19}H_{28}O_4$ |  | Rheum |
| R-41 | 1-O-Galloyl-glycerol                              | $C_{10}H_{12}O_7$ |  | Rheum |
| R-42 | 5-Carboxy-7-hydroxy-2-methyl-benzopyran-gamma-one | $C_{11}H_8O_6$    |  | Rheum |

R-43

beta-sitosterol

 $C_{29}H_{50}O$ 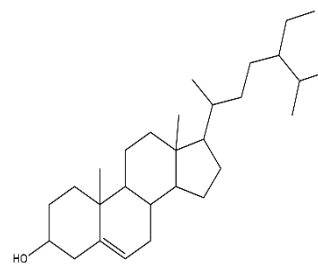

Rheum

R-44

Crysophanol

 $C_{15}H_{10}O_4$ 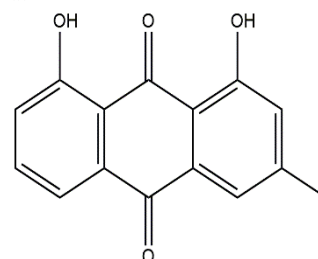

Rheum

R-45

laccaic acid D

 $C_{16}H_{10}O_7$ 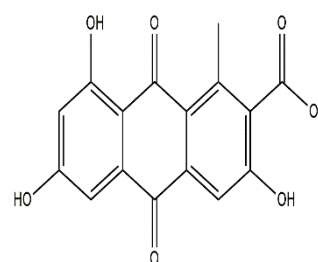

Rheum

R-46

PIT

 $C_{14}H_{12}O_4$ 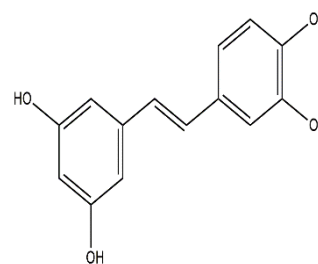

Rheum

R-47

Rhapontin

 $C_{21}H_{24}O_9$ 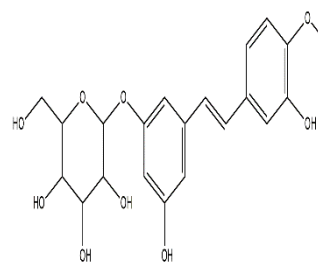

Rheum

R-48

Sennidin A

 $C_{30}H_{18}O_{10}$ 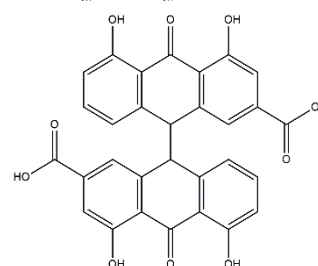

Rheum



R-49

Daucosterol\_qt

 $C_{29}H_{50}O$ 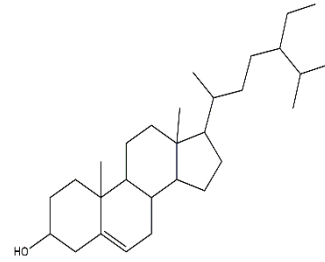

Rheum

R-50

o-Acetyltoluene

 $C_9H_{10}O$ 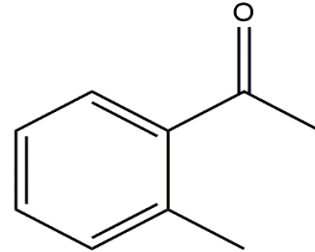

Rheum

R-51

cis-Zimtsaeure

 $C_9H_8O_2$ 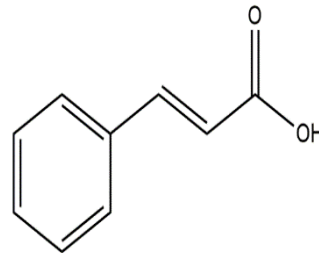

Rheum

R-52

Rottlerin

 $C_{30}H_{28}O_8$ 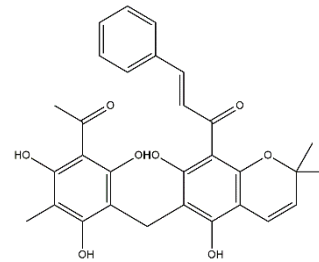

Rheum

S-1

Campesterol

 $C_{28}H_{48}O$ 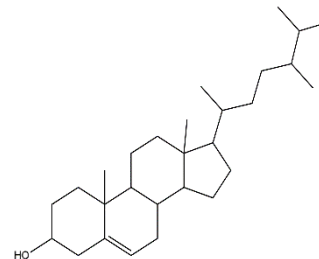

Rehmannia

S-2

Aucubin

 $C_{15}H_{22}O_9$ 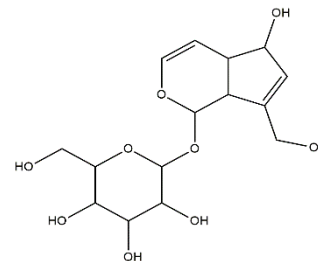

Rehmannia

---

S-3

Gamma-Aminobutyric Acid

$C_4H_9NO_2$

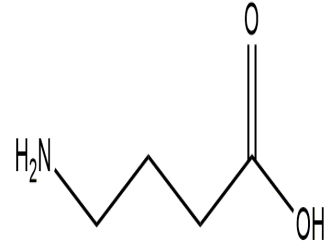

Rehmannia

S-4

Acteoside

$C_{29}H_{36}O_{15}$

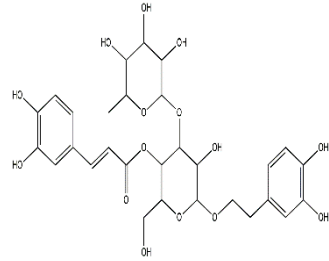

Rehmannia

S-5

Rehmannioside A

$C_{21}H_{32}O_{15}$

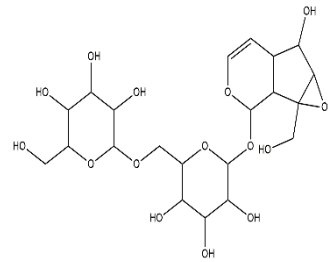

Rehmannia

---

Supplementary Table 2 The code and Uniprot ID of potential targets

| Code | Target   | Uniprot ID |
|------|----------|------------|
| T-1  | FASN     | P49327     |
| T-2  | F10      | P00742     |
| T-3  | PROS1    | P07225     |
| T-4  | PROZ     | P22891     |
| T-5  | F7       | P08709     |
| T-6  | F9       | P00740     |
| T-7  | GGCX     | P38435     |
| T-8  | VKORC1   | Q9BQB6     |
| T-9  | AVP      | P01185     |
| T-10 | F3       | P13726     |
| T-11 | CSF1     | P09603     |
| T-12 | PKD2     | Q13563     |
| T-13 | SERPINF2 | P08697     |
| T-14 | GAS6     | Q14393     |
| T-15 | ACSL4    | O60488     |

|      |          |        |
|------|----------|--------|
| T-16 | FGA      | P02671 |
| T-17 | ESR2     | Q92731 |
| T-18 | FGFR2    | P21802 |
| T-19 | WNT4     | P56705 |
| T-20 | TP53     | P04637 |
| T-21 | NR3C2    | P08235 |
| T-22 | CYP19A1  | P11511 |
| T-23 | CDKN1A   | P38936 |
| T-24 | CFTR     | P13569 |
| T-25 | BCHE     | P06276 |
| T-26 | F13A1    | P00488 |
| T-27 | LDHA     | P00338 |
| T-28 | KDR      | P35968 |
| T-29 | NR1H2    | O75469 |
| T-30 | CYP17A1  | P05093 |
| T-31 | OPRK1    | P41145 |
| T-32 | SRD5A1   | P18405 |
| T-33 | MED12    | Q93074 |
| T-34 | SMAD4    | Q13485 |
| T-35 | KLF9     | Q13886 |
| T-36 | FKBP4    | Q02790 |
| T-37 | ESRRA    | P11474 |
| T-38 | SRC      | P12931 |
| T-39 | CAV1     | Q03135 |
| T-40 | HSP90AA1 | P07900 |
| T-41 | CEBPB    | P17676 |
| T-42 | KCNN3    | Q9UGI6 |
| T-43 | TRIM25   | Q14258 |
| T-44 | HMGA2    | P52926 |
| T-45 | NEDD4    | P46934 |
| T-46 | ARID1A   | O14497 |
| T-47 | TALDO1   | P37837 |
| T-48 | GATA3    | P23771 |
| T-49 | IL10     | P22301 |
| T-50 | IDO1     | P14902 |
| T-51 | SELP     | P16109 |
| T-52 | GNAS     | P63092 |
| T-53 | PTGER3   | P43115 |
| T-54 | SERPINE1 | P05121 |
| T-55 | SLC12A6  | Q9UHW9 |
| T-56 | ORM1     | P02763 |
| T-57 | ESR1     | P03372 |
| T-58 | PTGS2    | P35354 |
| T-59 | F2       | P00734 |

|      |         |        |
|------|---------|--------|
| T-60 | LRRK2   | Q5S007 |
| T-61 | PGR     | P06401 |
| T-62 | VDR     | P11473 |
| T-63 | AR      | P10275 |
| T-64 | NR3C1   | P04150 |
| T-65 | BAX     | Q07812 |
| T-66 | DRD1    | P21728 |
| T-67 | LYZ     | P61626 |
| T-68 | PTEN    | P60484 |
| T-69 | DRD2    | P14416 |
| T-70 | ATP1A2  | P50993 |
| T-71 | ATP2A1  | O14983 |
| T-72 | P2RY12  | Q9H244 |
| T-73 | MMP2    | P08253 |
| T-74 | MMP9    | P14780 |
| T-75 | ABCG8   | Q9H221 |
| T-76 | PLG     | P00747 |
| T-77 | CES1    | P23141 |
| T-78 | IARS    | P41252 |
| T-79 | SLC25A2 | Q9BXI2 |
| T-80 | ABCC2   | Q92887 |
| T-81 | F12     | P00748 |
| T-82 | KLKB1   | P03952 |
| T-83 | STAR    | P49675 |
| T-84 | F11     | P03951 |
| T-85 | KNG1    | P01042 |
| T-86 | C3      | P01024 |
| T-87 | STAT1   | P42224 |

---



---

| Target | Degree | Average shortest path length | Closeness centrality | Betweenness centrality |
|--------|--------|------------------------------|----------------------|------------------------|
|--------|--------|------------------------------|----------------------|------------------------|

---

Supplementary Table 3 The topological properties of the potential targets

|          |    |            |            |            |
|----------|----|------------|------------|------------|
| PTGS2    | 35 | 2.48965517 | 0.40166205 | 0.13728934 |
| ESR1     | 15 | 2.66896552 | 0.374677   | 0.04178334 |
| ESR2     | 12 | 2.80689655 | 0.35626536 | 0.01972041 |
| F10      | 11 | 3.19310345 | 0.31317495 | 0.00965339 |
| PGR      | 10 | 2.76551724 | 0.36159601 | 0.02327449 |
| F7       | 7  | 3.24827586 | 0.30785563 | 0.00465111 |
| VDR      | 6  | 2.84827586 | 0.35108959 | 0.00962061 |
| NR1I2    | 5  | 3          | 0.33333333 | 0.00633892 |
| BCHE     | 5  | 3.74482759 | 0.26703499 | 0.00083573 |
| WNT4     | 5  | 2.95862069 | 0.33799534 | 0.00349146 |
| FGFR2    | 5  | 2.95862069 | 0.33799534 | 0.00349146 |
| NR3C1    | 5  | 2.84827586 | 0.35108959 | 0.01069455 |
| TP53     | 4  | 2.94482759 | 0.33957845 | 0.00493188 |
| FASN     | 4  | 3.68965517 | 0.27102804 | 0.00016353 |
| DRD2     | 4  | 2.69655172 | 0.37084399 | 0.0297144  |
| LYZ      | 4  | 3.22068966 | 0.31049251 | 0.01500104 |
| DRD1     | 4  | 2.68275862 | 0.37275064 | 0.03131391 |
| AR       | 4  | 2.87586207 | 0.34772182 | 0.00851301 |
| SERPINE1 | 3  | 3.73103448 | 0.26802218 | 0.00015335 |
| CDKN1A   | 3  | 2.95862069 | 0.33799534 | 0.00319541 |
| CYP19A1  | 3  | 3.0137931  | 0.33180778 | 0.00243904 |
| NR3C2    | 3  | 3.02758621 | 0.33029613 | 0.00214676 |
| BAX      | 3  | 3.4137931  | 0.29292929 | 0.00139936 |
| F2       | 3  | 3.04137931 | 0.32879819 | 0.02302678 |
| OPRK1    | 2  | 3          | 0.33333333 | 0.00125424 |
| KDR      | 2  | 3.68965517 | 0.27102804 | 0.00004002 |
| LDHA     | 2  | 3.7862069  | 0.26411658 | 0.00004789 |
| GAS6     | 2  | 2.82068966 | 0.35452323 | 0.01889716 |
| F3       | 2  | 3.4137931  | 0.29292929 | 0.00062446 |
| VKORC1   | 2  | 3.42758621 | 0.2917505  | 0.00087456 |
| P2RY12   | 2  | 3.16551724 | 0.31590414 | 0.00682262 |
| ATP2A1   | 2  | 2.76551724 | 0.36159601 | 0.01545134 |
| ATP1A2   | 2  | 2.76551724 | 0.36159601 | 0.01545134 |
| PTEN     | 2  | 2.76551724 | 0.36159601 | 0.01545134 |
| LRRK2    | 2  | 3.06896552 | 0.3258427  | 0.01696818 |
| ORM1     | 1  | 3.49655172 | 0.28599606 | 0          |
| SLC12A6  | 1  | 3.49655172 | 0.28599606 | 0          |
| PTGER3   | 1  | 3.08275862 | 0.32438479 | 0          |
| GNAS     | 1  | 3.08275862 | 0.32438479 | 0          |
| SELP     | 1  | 3.08275862 | 0.32438479 | 0          |
| IDO1     | 1  | 3.08275862 | 0.32438479 | 0          |
| IL10     | 1  | 3.08275862 | 0.32438479 | 0          |
| GATA3    | 1  | 3.08275862 | 0.32438479 | 0          |
| TALDO1   | 1  | 3.08275862 | 0.32438479 | 0          |



---

|          |   |            |            |   |
|----------|---|------------|------------|---|
| ARID1A   | 1 | 3.08275862 | 0.32438479 | 0 |
| NEDD4    | 1 | 3.08275862 | 0.32438479 | 0 |
| HMGGA2   | 1 | 3.08275862 | 0.32438479 | 0 |
| TRIM25   | 1 | 3.08275862 | 0.32438479 | 0 |
| KCNN3    | 1 | 3.08275862 | 0.32438479 | 0 |
| CEBPB    | 1 | 3.08275862 | 0.32438479 | 0 |
| HSP90AA1 | 1 | 3.08275862 | 0.32438479 | 0 |
| CAV1     | 1 | 3.08275862 | 0.32438479 | 0 |
| SRC      | 1 | 3.08275862 | 0.32438479 | 0 |
| ESRRA    | 1 | 3.08275862 | 0.32438479 | 0 |
| FKBP4    | 1 | 3.08275862 | 0.32438479 | 0 |
| KLF9     | 1 | 3.08275862 | 0.32438479 | 0 |
| SMAD4    | 1 | 3.08275862 | 0.32438479 | 0 |
| MED12    | 1 | 3.08275862 | 0.32438479 | 0 |
| SRD5A1   | 1 | 3.08275862 | 0.32438479 | 0 |
| CYP17A1  | 1 | 3.08275862 | 0.32438479 | 0 |
| F13A1    | 1 | 3.8        | 0.26315789 | 0 |
| CFTR     | 1 | 3.8        | 0.26315789 | 0 |
| FGA      | 1 | 3.44137931 | 0.29058116 | 0 |
| ACSL4    | 1 | 3.44137931 | 0.29058116 | 0 |
| SERPINF2 | 1 | 3.44137931 | 0.29058116 | 0 |
| PKD2     | 1 | 3.44137931 | 0.29058116 | 0 |
| CSF1     | 1 | 3.44137931 | 0.29058116 | 0 |
| AVP      | 1 | 3.44137931 | 0.29058116 | 0 |
| GGCX     | 1 | 3.44137931 | 0.29058116 | 0 |
| F9       | 1 | 3.44137931 | 0.29058116 | 0 |
| PROZ     | 1 | 3.44137931 | 0.29058116 | 0 |
| PROS1    | 1 | 3.44137931 | 0.29058116 | 0 |
| STAT1    | 1 | 5.17931034 | 0.1930759  | 0 |
| C3       | 1 | 4.02068966 | 0.24871355 | 0 |
| KNG1     | 1 | 4.02068966 | 0.24871355 | 0 |
| F11      | 1 | 4.02068966 | 0.24871355 | 0 |
| STAR     | 1 | 4.02068966 | 0.24871355 | 0 |
| KLKB1    | 1 | 4.02068966 | 0.24871355 | 0 |
| F12      | 1 | 4.02068966 | 0.24871355 | 0 |
| ABCC2    | 1 | 4.02068966 | 0.24871355 | 0 |
| SLC25A2  | 1 | 4.02068966 | 0.24871355 | 0 |
| IARS     | 1 | 4.02068966 | 0.24871355 | 0 |
| CES1     | 1 | 4.02068966 | 0.24871355 | 0 |
| PLG      | 1 | 4.02068966 | 0.24871355 | 0 |
| ABCG8    | 1 | 4.13103448 | 0.24207012 | 0 |
| MMP9     | 1 | 5.16551724 | 0.19359146 | 0 |
| MMP2     | 1 | 5.16551724 | 0.19359146 | 0 |

---



Supplementary Table 4 The KEEG for the treatment of DUB by SDHD

| Pathways                            | Count | P-Value  | Genes                                                              | FDR         |
|-------------------------------------|-------|----------|--------------------------------------------------------------------|-------------|
| Complement and coagulation cascades | 12    | 6.72E-11 | KNG1, F12, F10, C3, SERPINF2, KLKB1, F3, F2, SERPINE1, F9, F7, PLG | 8.18E-08    |
| Pathways in cancer                  | 15    | 1.78E-05 | FGFR2, AR, HSP90AA1, PTGER3, PTGS2, MMP9, SMAD4,                   | 0.021666409 |

|                                                           |   |            |                                                      |             |
|-----------------------------------------------------------|---|------------|------------------------------------------------------|-------------|
|                                                           |   |            | TP53, STAT1, PTEN, MMP2, WNT4, CDKN1A, BAX, GNAS     |             |
| Estrogen signaling pathway                                | 8 | 3.84E-05   | HSP90AA1, MMP9, FKBP4, ESR1, GNAS, ESR2, MMP2, SRC   | 0.046723743 |
| Bladder cancer                                            | 5 | 4.88E-04   | CDKN1A, MMP9, TP53, MMP2, SRC                        | 0.59184219  |
| Proteoglycans in cancer                                   | 9 | 5.01E-04   | CDKN1A, CAV1, WNT4, MMP9, ESR1, TP53, MMP2, SRC, KDR | 0.607468593 |
| Hepatitis B                                               | 8 | 6.49E-04   | CDKN1A, MMP9, BAX, SMAD4, TP53, STAT1, PTEN, SRC     | 0.786944169 |
| Thyroid hormone signaling pathway                         | 7 | 7.94E-04   | WNT4, ESR1, TP53, MED12, ATP1A2, STAT1, SRC          | 0.962064641 |
| Prostate cancer                                           | 6 | 0.00140601 | FGFR2, AR, CDKN1A, HSP90AA1, TP53, PTEN              | 1.696798913 |
| Tuberculosis                                              | 8 | 0.00149422 | VDR, CEBPB, C3, BAX, STAT1, IL10, SRC                | 1.802360518 |
| Ovarian steroidogenesis                                   | 5 | 0.00150096 | CYP17A1, STAR, PTGS2, GNAS, CYP19A1                  | 1.81042333  |
| Prolactin signaling pathway                               | 5 | 0.00387729 | CYP17A1, ESR1, ESR2, STAT1, SRC                      | 4.615271421 |
| Bile secretion                                            | 5 | 0.00431743 | ABCG8, GNAS, CFTR, ATP1A2, ABCC2                     | 5.126637858 |
| p53 signaling pathway                                     | 5 | 0.00529662 | CDKN1A, BAX, SERPINE1, TP53, PTEN                    | 6.255278434 |
| Endocrine and other factor-regulated calcium reabsorption | 4 | 0.00739009 | VDR, ESR1, GNAS, ATP1A2                              | 8.627033209 |
| Staphylococcus aureus infection                           | 4 | 0.01016358 | SELP, C3, PLG, IL10                                  | 11.68442766 |
| Transcriptional misregulation in cancer                   | 6 | 0.01725542 | CDKN1A, CEBPB, MMP9, TP53, HMGA2                     | 19.08024849 |
| TNF signaling pathway                                     | 5 | 0.02122415 | CEBPB, PTGS2, MMP9, CSF1                             | 22.96663058 |
| Leishmaniasis                                             | 4 | 0.02266374 | PTGS2, C3, STAT1, IL10                               | 24.3334726  |
| cAMP signaling pathway                                    | 6 | 0.04434658 | DRD1, PTGER3, DRD2, GNAS, CFTR, ATP1A2               | 42.40418256 |
| Neuroactive ligand-receptor interaction                   | 7 | 0.04627307 | DRD1, PTGER3, DRD2, OPRK1, F2, NR3C1, PLG            | 43.80062473 |
| Rap1 signaling pathway                                    | 6 | 0.05105271 | FGFR2, DRD2, CSF1, GNAS, SRC, KDR                    | 47.13210419 |
| Pancreatic secretion                                      | 4 | 0.05200314 | ATP2A1, GNAS, CFTR, ATP1A2                           | 47.77256158 |
| Gap junction                                              | 4 | 0.05500464 | DRD1, DRD2, GNAS, SRC                                | 49.7486918  |
| ABC transporters                                          | 3 | 0.06626564 | ABCG8, CFTR, ABCC2                                   | 56.56679295 |
| Cocaine addiction                                         | 3 | 0.07175697 | DRD1, DRD2, GNAS                                     | 59.57367836 |
| MicroRNAs in cancer                                       | 6 | 0.07243133 | CDKN1A, PTGS2, MMP9, TP53, HMGA2, PTEN               | 59.92945834 |
| Chagas disease (American trypanosomiasis)                 | 4 | 0.0874343  | C3, SERPINE1, GNAS, IL10                             | 67.1385575  |
| Steroid hormone biosynthesis                              | 3 | 0.09205283 | CYP17A1, SRD5A1, CYP19A1                             | 69.10527352 |
| Ubiquinone and other terpenoid-quinone biosynthesis       | 2 | 0.09398475 | GGCX, VKORC1                                         | 69.89542185 |
| PI3K-Akt signaling pathway                                | 7 | 0.09943877 | FGFR2, CDKN1A, HSP90AA1, CSF1, TP53, PTEN, KDR       | 72.0270941  |

Supplementary Table 5 The GO-BP pathways for the treatment of DUB by SDHD

| Pathways | Genecounts | P-Value | Genes | FDR |
|----------|------------|---------|-------|-----|
|----------|------------|---------|-------|-----|

|                                                                                    |    |             |                                                                         |             |
|------------------------------------------------------------------------------------|----|-------------|-------------------------------------------------------------------------|-------------|
| Blood coagulation                                                                  | 9  | 2.76E-11    | P2RY12, F12, F10, F3, F2, F9, F7, PLG, GAS6                             | 4.36E-08    |
| Transcription, DNA-templated                                                       | 13 | 2.37E-07    | PGR, VDR, AR, ESRRA, CEBPB, NR1I2, KLF9, ESR1, TP53, ESR2, NR3C1, STAT1 | 3.74E-04    |
| Positive regulation of protein kinase B signaling                                  | 6  | 5.56E-06    | F10, GATA3, F3, F7, SRC, GAS6                                           | 0.008759559 |
| Positive regulation of sequence-specific DNA binding transcription factor activity | 6  | 1.66E-05    | CEBPB, ESR1, ESR2, PTEN, IL10                                           | 0.026139463 |
| Negative regulation of endothelial cell apoptotic process                          | 4  | 1.55E-04    | GATA3, SERPINE1, GAS6, KDR                                              | 0.244768094 |
| Positive regulation of transcription, DNA-templated                                | 8  | 2.32E-04    | AR, NR1I2, CEBPB, GATA3, ESR1, ESR2, STAT1                              | 0.365841533 |
| Positive regulation of ERK1 and ERK2 cascade                                       | 6  | 5.23E-04    | FGFR2, SERPINF2, PTEN, SRC, GAS6, KDR                                   | 0.821623839 |
| Uterus development                                                                 | 3  | 8.14E-04    | GATA3, SMAD4, SRC                                                       | 1.275397828 |
| Fibrinolysis                                                                       | 3  | 8.14E-04    | F12, F2, PLG                                                            | 1.275397828 |
| Prostate gland growth                                                              | 3  | 0.001080713 | AR, PTEN, CYP19A1                                                       | 1.690236741 |
| Positive regulation of transcription from RNA polymerase II promoter               | 10 | 0.001649139 | FGFR2, VDR, AR, SERPINF2, GATA3, SMAD4, PKD2, TP53, NR3C1, IL10         | 2.568481604 |
| Positive regulation of canonical Wnt signaling pathway                             | 4  | 0.002342857 | FGFR2, CAV1, LRRK2, SRC                                                 | 3.630353644 |
| Androgen receptor signaling pathway                                                | 3  | 0.003426999 | AR, FKBP4, MED12                                                        | 5.268162717 |
| Positive regulation of nitric oxide biosynthetic process                           | 3  | 0.003426999 | HSP90AA1, ESR1, PKD2                                                    | 5.268162717 |
| Positive regulation of release of cytochrome c from mitochondria                   | 3  | 0.003938083 | MMP9, BAX, TP53                                                         | 6.031179612 |
| Negative regulation of interferon-gamma production                                 | 3  | 0.003938083 | GATA3, IL10, GAS6                                                       | 6.031179612 |
| Steroid hormone mediated signaling pathway                                         | 3  | 0.004482296 | VDR, AR, NR1I2                                                          | 6.837327168 |
| Positive regulation of intrinsic apoptotic signaling pathway                       | 3  | 0.006309451 | CAV1, BAX, TP53                                                         | 9.496779643 |
| Embryo implantation                                                                | 3  | 0.007685455 | MMP9, FKBP4, MMP2                                                       | 11.45245789 |
| Positive regulation of platelet-derived growth factor receptor signaling pathway   | 2  | 0.012627575 | F3, F7                                                                  | 18.15505231 |
| Angiotensin-activated signaling pathway involved in heart process                  | 2  | 0.012627575 | CAV1, SRC                                                               | 18.15505231 |
| Protein localization                                                               | 3  | 0.015347134 | CAV1, DRD2, TP53                                                        | 21.63761645 |
| Positive regulation of apoptotic process involved in mammary gland involution      | 2  | 0.018882266 | VDR, BAX                                                                | 25.95733298 |

|                                                            |   |             |                             |             |
|------------------------------------------------------------|---|-------------|-----------------------------|-------------|
| Positive regulation of B cell apoptotic process            | 2 | 0.018882266 | BAX, IL10                   | 25.95733298 |
| Angiogenesis                                               | 4 | 0.021659068 | FGFR2, CAV1, SERPINE1, PTEN | 29.19292369 |
| Cell fate commitment                                       | 3 | 0.022839291 | FGFR2, WNT4, GATA3          | 30.52763025 |
| Negative regulation of protein binding                     | 3 | 0.022839291 | CAV1, BAX, LRRK2            | 30.52763025 |
| Negative regulation of fibrinolysis                        | 2 | 0.025097882 | SERPINF2, SERPINE1          | 33.01641442 |
| Negative regulation of cytosolic calcium ion concentration | 2 | 0.025097882 | DRD2, ATP1A2                | 33.01641442 |
| Branching morphogenesis of anerve                          | 2 | 0.025097882 | FGFR2, DRD2                 | 33.01641442 |

Supplementary Table 6 The GO-CC pathways for the treatment of DUB by SDHD

| Pathways            | Count | P-Value  | Genes                                                                                  | FDR         |
|---------------------|-------|----------|----------------------------------------------------------------------------------------|-------------|
| Extracellular space | 17    | 7.70E-06 | F12, SELP, C3, MMP9, LYZ, F9, MMP2, IL10, GAS6, ORM1, WNT4, BCHE, SERPINF2, F3, KLKB1, | 0.008895552 |

|                                       |    |             |                                                                                                                              |             |
|---------------------------------------|----|-------------|------------------------------------------------------------------------------------------------------------------------------|-------------|
|                                       |    |             | SERPINE1, LRRK2                                                                                                              |             |
| Extracellular exosome                 | 20 | 0.001887662 | KNG1, LDHA, TALDO1, FKBP4, MMP9, LYZ, F9, CFTR, GAS6, SRC, SERPINF2, KLKB1, F3, BAX, F2, SERPINE1, PKD2, GNAS, ACSL4, LRRK2  | 2.158196315 |
| Blood microparticle                   | 4  | 0.004875839 | KNG1, BCHE, SERPINF2, F2                                                                                                     | 5.487790868 |
| Integral component of plasma membrane | 11 | 0.0072771   | P2RY12, DRD1, CAV1, PTGER3, DRD2, OPRK1, ATP2A1, PKD2, ATP1A2, ABCC2, KDR                                                    | 8.088048025 |
| Extracellular region                  | 8  | 0.0102326   | AVP, F10, KLKB1, F2, LYZ, F7, PLG, GAS6                                                                                      | 11.19871063 |
| Caveola                               | 3  | 0.015305802 | CAV1, LRRK2, SRC                                                                                                             | 16.31491026 |
| Extracellular matrix                  | 4  | 0.016226797 | MMP9, F3, SERPINE1, MMP2                                                                                                     | 17.21430195 |
| Nuclear chromatin                     | 4  | 0.025535573 | AR, GATA3, SMAD4, TP53                                                                                                       | 25.82185695 |
| Apical plasma membrane                | 4  | 0.033511087 | ABCG8, CFTR, ABCC2, PTEN                                                                                                     | 32.53759194 |
| Nucleus                               | 20 | 0.034103353 | FGFR2, AR, ESRRA, LDHA, TALDO1, HSP90AA1, CEBPB, KLF9, ESR1, TP53, ESR2, NR3C1, HMGA2, STAT1, SRC, PGR, CDKN1A, NR1I2, GATA3 | 33.01343578 |
| Nonmotile primary cilium              | 2  | 0.057688404 | DRD2, PKD2                                                                                                                   | 49.64843401 |
| Endoplasmic reticulum                 | 6  | 0.063252541 | CAV1, BCHE, TP53, LRRK2, KDR, CYP19A1                                                                                        | 52.97672943 |
| Cell surface                          | 5  | 0.06594799  | P2RY12, SERPINF2, F3, CFTR, ABCC2                                                                                            | 54.51568847 |
| Axon                                  | 3  | 0.090272347 | CYP17A1, DRD2, LRRK2                                                                                                         | 66.4624085  |

Supplementary Table 7 The GO-MF pathways for the treatment of DUB by SDHD

| Pathways                           | Count | P-Value  | Genes                                        | FDR         |
|------------------------------------|-------|----------|----------------------------------------------|-------------|
| Steroid binding                    | 6     | 1.36E-07 | PGR, AR, ESRRA, ESR1, ESR2, NR3C1            | 1.73E-04    |
| Serine-type endopeptidase activity | 9     | 1.16E-06 | F12, F10, MMP9, KLKB1, F2, F9, F7, MMP2, PLG | 0.001477441 |

|                                                                                                               |    |             |                                                                                         |             |
|---------------------------------------------------------------------------------------------------------------|----|-------------|-----------------------------------------------------------------------------------------|-------------|
| Sequence-specific DNA binding                                                                                 | 11 | 1.45E-05    | PGR, VDR, AR, ESRRA, NR1I2, CEBPB, ESR1, TP53, ESR2, NR3C1                              | 0.018417583 |
| Steroid hormone receptor activity                                                                             | 5  | 3.85E-04    | PGR, VDR, ESRRA, NR1I2, NR3C1                                                           | 0.488008821 |
| Transcription factor activity, sequence-specific DNA binding                                                  | 10 | 0.001640547 | PGR, AR, ESRRA, NR1I2, CEBPB, ESR1, TP53, ESR2, NR3C1                                   | 2.066841911 |
| Protein heterodimerization activity                                                                           | 4  | 0.002304121 | CAV1, BAX, SMAD4, TP53                                                                  | 2.891606423 |
| RNA polymerase II transcription factor binding                                                                | 3  | 0.002403823 | GATA3, SMAD4, TP53                                                                      | 3.014973488 |
| Transcriptional activator activity, RNA polymerase II core promoter proximal region sequence-specific binding | 6  | 0.002579331 | PGR, AR, ESRRA, GATA3, SMAD4, NR3C1                                                     | 3.23178755  |
| DNA binding                                                                                                   | 10 | 0.00444299  | AR, CEBPB, KLF9, ESR1, TP53, ARID1A, NR3C1, HMGA2, STAT1                                | 5.50667887  |
| Heme binding                                                                                                  | 5  | 0.005774719 | CYP17A1, PTGS2, IDO1, SRC, CYP19A1                                                      | 7.101964618 |
| Dopamine neurotransmitter receptor activity                                                                   | 2  | 0.013531644 | DRD1, DRD2                                                                              | 15.91134307 |
| Zinc ion binding                                                                                              | 12 | 0.017484069 | PGR, VDR, AR, ESRRA, NR1I2, GATA3, MMP9, ESR1, TRIM25, ESR2, NR3C1, MMP2                | 20.09770447 |
| Steroid hormone binding                                                                                       | 2  | 0.020229555 | ATP1A2, NR3C1                                                                           | 22.89172344 |
| Glycoprotein binding                                                                                          | 3  | 0.023415255 | SELP, F7, LRRK2                                                                         | 26.0207782  |
| Identical protein binding                                                                                     | 3  | 0.027307476 | CAV1, LYZ, TP53                                                                         | 29.6848968  |
| Estrogen receptor activity                                                                                    | 2  | 0.033491049 | ESR1, ESR2                                                                              | 35.16374838 |
| ATP binding                                                                                                   | 13 | 0.034254176 | FGFR2, HSP90AA1, FKBP4, TP53, CFTR, ATP1A2, SRC, KDR, ABCG8, IARS, ATP2A1, ABCC2, LRRK2 | 35.81191938 |
| Calcium ion binding                                                                                           | 8  | 0.040623172 | F12, F10, F2, ATP2A1, PKD2, F9, F7, GAS6                                                | 40.99323061 |
| RNA polymerase II core promoter proximal region sequence-specific DNA binding                                 | 5  | 0.043386557 | PGR, AR, ESRRA, SMAD4, NR3C1                                                            | 43.11904916 |
| Cholesterol transporter activity                                                                              | 2  | 0.059484959 | ABCG8, STAR                                                                             | 54.1635838  |
| Dopamine binding                                                                                              | 2  | 0.065874907 | DRD1, DRD2                                                                              | 57.97088093 |
| Chaperone binding                                                                                             | 2  | 0.072222015 | TP53, ATP1A2                                                                            | 61.46223743 |
| Chromatin binding                                                                                             | 5  | 0.073599179 | AR, GATA3, SMAD4, TP53, MED12                                                           | 62.18358299 |
